# Supplementary material for: National and Regional Trends in Police Pursuit Fatalities in the US
Source: PubMed Central journal article supplement (PMC11582929; doi:10.1001/jamanetworkopen.2024.46415), 2024-11-21
Supplement: jamanetwopen-e2446415-s002.pdf [file jamanetwopen-e2446415-s002.pdf]

## Data Sharing Statement

Bather. National and Regional Trends in Police Pursuit Fatalities in the US. *JAMA Netw Open*. Published November 21, 2024. doi:10.1001/jamanetworkopen.2024.46415

### Data

**Data available:** Yes

**Data types:** Other (please specify)

**Additional Information:** The data that support the findings of this study are openly available ([https://github.com/sfchronicle/police\\_pursuits](https://github.com/sfchronicle/police_pursuits)).

**How to access data:** The data that support the findings of this study are openly available ([https://github.com/sfchronicle/police\\_pursuits](https://github.com/sfchronicle/police_pursuits)).

**When available:** With publication

### Supporting Documents

**Document types:** None

### Additional Information

**Who can access the data:** Anyone requesting the data

**Types of analyses:** Any purpose

**Mechanisms of data availability:** Publicly available
